# Supplementary material
Source: Springer Nature journal article supplement (https://www.springermedizin.de/resource/supplementary/12936_2007_632_MOESM5_ESM.pdf/9547864)

|                 |   |   |   |   |
|-----------------|---|---|---|---|
| HZ              | - | + | - | - |
| HETE 1 $\mu$ M  | - | - | + | - |
| HETE 10 $\mu$ M | - | - | - | + |

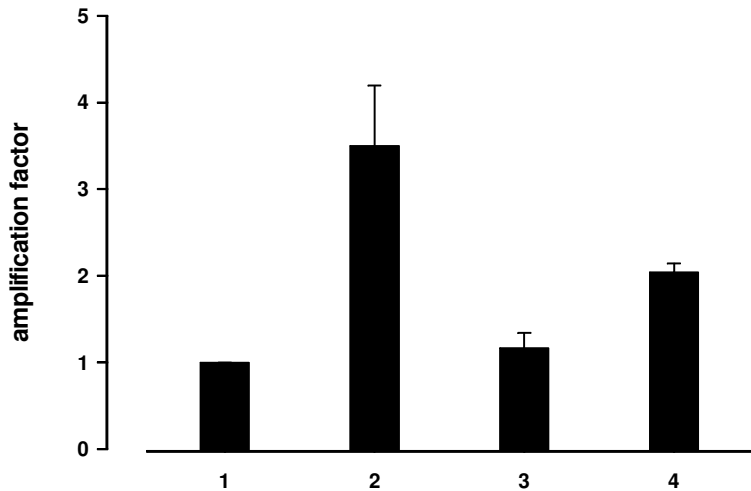

Supplement: MOESM5 [file 9547864]
